# Supplementary material for: Mutant Lines of Spring Wheat with Increased Iron, Zinc, and Micronutrients in Grains and Enhanced Bioavailability for Human Health
Source: Hindawi journal article supplement (doi:10.1155/2019/9692053), 2019-03-14
Supplement: f1 [file 9692053.f1.pdf]

**Supplementary Table S1.** Variability of grain traits: concentrations of Fe, Zn, Ca and phytic acid (Phy), grain content (GPC), molar ratios of phytic acid to Fe (Phy:Fe), Zn (Phy:Zn) and Ca:Phy molar ratio and 1000 g weight (TGW) in spring wheat parental cv. Zhenis and 100- and 200-Gy derived M<sub>7</sub> mutant lines. The traits were measured in triplicates in each mutant line.

| Genotype | Fe, mg/kg | Zn, mg/kg | Ca, mg/kg | GPC, % | Phy, mg/g | Phy:Fe, mol | Phy:Zn mol | Ca:Phy mol |
|----------|-----------|-----------|-----------|--------|-----------|-------------|------------|------------|
| Zhenis-1 | 35,10     | 35,9      | 350,6     | 13,0   | 2,581     | 6,21        | 7,10       | 2,24       |
| Zhenis-2 | 31,10     | 39,3      | 365,1     | 13,0   | 2,625     | 7,19        | 6,66       | 2,28       |
| Zhenis-2 | 33,24     | 33,1      | 355,5     | 12,9   | 2,562     | 6,56        | 7,71       | 2,27       |
| 39/2-1   | 65,87     | 42,7      | 697,2     | 13,8   | 2,477     | 3,22        | 5,21       | 5,12       |
| 39/2-2   | 64,90     | 45        | 617,2     | 14,0   | 2,547     | 3,36        | 4,94       | 4,53       |
| 39/2-3   | 64,73     | 49,3      | 683,4     | 13,9   | 1,725     | 2,25        | 4,51       | 5,01       |
| 13/9-1   | 48,03     | 25,3      | 563,8     | 13,9   | 2,504     | 4,42        | 9,82       | 3,70       |
| 13/9-2   | 44,93     | 22,2      | 668,9     | 13,8   | 2,660     | 4,98        | 11,78      | 4,17       |
| 13/9-3   | 44,04     | 23,1      | 638,8     | 14,0   | 2,611     | 5,08        | 11,32      | 3,99       |
| 29/8-1   | 44,51     | 52,7      | 883,0     | 14,0   | 2,589     | 4,90        | 4,84       | 5,65       |
| 29/8-2   | 42,02     | 52,3      | 879,9     | 13,9   | 2,568     | 5,19        | 4,88       | 5,63       |
| 29/8-3   | 40,98     | 52,4      | 872,0     | 13,9   | 2,576     | 5,32        | 4,87       | 5,58       |
| 10/15-1  | 51,66     | 35,1      | 585,8     | 13,9   | 2,607     | 4,22        | 7,27       | 3,75       |
| 10/15-2  | 51,58     | 35,3      | 554,5     | 13,9   | 2,627     | 4,34        | 7,41       | 3,46       |
| 10/15-3  | 53,82     | 38,1      | 519,1     | 13,9   | 2,607     | 4,05        | 6,69       | 3,32       |
| 42/4-1   | 70,56     | 66,5      | 449,3     | 13,9   | 2,604     | 3,09        | 3,84       | 2,87       |
| 42/4-2   | 75,59     | 61,2      | 443,6     | 14,1   | 2,472     | 2,74        | 3,95       | 2,99       |
| 42/4-3   | 72,65     | 63,6      | 426,1     | 13,8   | 2,443     | 2,85        | 3,80       | 2,87       |
| 36/13-1  | 50,68     | 53,8      | 407,8     | 13,9   | 2,350     | 3,97        | 4,38       | 2,83       |
| 36/13-2  | 53,76     | 54,8      | 404,8     | 14,0   | 2,552     | 4,06        | 4,65       | 2,59       |
| 36/13-3  | 59,73     | 54,8      | 437,9     | 13,9   | 2,523     | 3,56        | 4,54       | 2,88       |
| 43/43-1  | 47,03     | 65,3      | 873,3     | 14,0   | 2,475     | 4,40        | 3,71       | 5,89       |
| 43/43-2  | 47,03     | 68,1      | 865,2     | 14,0   | 2,587     | 4,64        | 3,75       | 5,54       |
| 43/43-3  | 45,82     | 66,5      | 861,3     | 14,0   | 2,522     | 4,64        | 3,74       | 5,66       |
| 16/4-1   | 49,49     | 61,1      | 190,8     | 13,9   | 1,958     | 3,39        | 3,21       | 1,59       |
| 16/4-2   | 47,14     | 63,6      | 172,3     | 13,9   | 1,665     | 2,96        | 3,19       | 1,39       |
| 16/4-3   | 48,84     | 63,8      | 191,2     | 13,8   | 2,612     | 4,58        | 3,28       | 1,49       |
| 37/4-1   | 52,81     | 54,8      | 701,8     | 13,9   | 2,520     | 4,02        | 4,54       | 4,61       |
| 37/4-2   | 51,13     | 48,8      | 739,0     | 14,0   | 2,599     | 4,26        | 5,23       | 4,73       |
| 37/4-3   | 52,27     | 47,9      | 710,5     | 14,1   | 2,484     | 4,06        | 5,19       | 4,67       |
| 18/2-1   | 47,90     | 45,8      | 778,7     | 13,9   | 2,517     | 4,43        | 5,43       | 5,88       |
| 18/2-2   | 47,93     | 21,8      | 711,8     | 14,1   | 2,596     | 4,55        | 6,10       | 5,24       |
| 18/2-3   | 48,46     | 32,1      | 776,2     | 13,9   | 2,577     | 4,50        | 7,95       | 5,71       |
| 49/2-1   | 42,76     | 67,9      | 345,8     | 13,8   | 2,513     | 4,97        | 3,66       | 2,27       |
| 49/2-2   | 40,99     | 68,4      | 355,9     | 13,9   | 2,591     | 5,32        | 3,73       | 2,28       |
| 49/2-3   | 45,74     | 61,8      | 355,5     | 13,9   | 2,575     | 4,77        | 4,13       | 2,27       |
| 52/10-1  | 62,10     | 72,1      | 619,7     | 13,7   | 1,882     | 2,61        | 2,72       | 5,15       |
| 52/10-2  | 63,08     | 79,6      | 631,7     | 13,7   | 2,335     | 3,10        | 2,79       | 4,64       |
| 52/10-3  | 62,31     | 77,8      | 627,4     | 13,8   | 2,201     | 2,96        | 2,77       | 4,74       |
| 6/9-1    | 50,30     | 67,9      | 733,0     | 13,8   | 2,288     | 3,89        | 3,37       | 5,23       |
| 6/9-2    | 55,34     | 68,4      | 764,4     | 13,9   | 2,215     | 3,43        | 3,25       | 5,61       |
| 6/9-3    | 58,66     | 61,8      | 767,2     | 14,2   | 2,164     | 3,14        | 3,49       | 5,80       |
| 53/5-1   | 63,28     | 82,1      | 524,6     | 13,7   | 2,234     | 3,00        | 2,71       | 3,85       |
| 53/5-2   | 64,21     | 89,6      | 534,1     | 13,8   | 2,314     | 3,05        | 2,55       | 3,81       |
| 53/5-3   | 66,51     | 87,8      | 519,1     | 13,7   | 2,180     | 2,77        | 2,46       | 3,92       |
| 24/21-1  | 74,98     | 61        | 442,1     | 13,7   | 1,319     | 1,49        | 2,14       | 5,52       |
| 24/21-2  | 71,22     | 64,1      | 431,6     | 13,8   | 1,759     | 2,12        | 2,14       | 5,13       |
| 24/21-3  | 72,02     | 66,3      | 421,5     | 13,8   | 0,768     | 0,93        | 1,78       | 5,84       |
| 45/1-1   | 44,23     | 86,9      | 414,2     | 13,6   | 2,111     | 4,04        | 2,41       | 3,23       |

|         |       |       |       |      |       |      |       |       |
|---------|-------|-------|-------|------|-------|------|-------|-------|
| 45/1-2  | 41,16 | 89,5  | 420,6 | 13,6 | 2,192 | 4,48 | 2,41  | 3,18  |
| 45/1-3  | 41,52 | 85,3  | 437,4 | 13,7 | 2,161 | 4,44 | 2,53  | 3,31  |
| 26/5-1  | 83,56 | 22,2  | 533,3 | 13,6 | 1,865 | 1,87 | 8,25  | 4,75  |
| 26/5-2  | 86,52 | 23,1  | 521,5 | 13,9 | 2,190 | 2,13 | 9,34  | 3,94  |
| 26/5-3  | 88,33 | 24,8  | 561,3 | 13,9 | 1,836 | 1,77 | 7,38  | 5,00  |
| 11/6-1  | 55,24 | 40,8  | 708,1 | 13,7 | 2,018 | 3,14 | 4,97  | 5,70  |
| 11/6-2  | 51,82 | 40,9  | 702,3 | 13,8 | 2,140 | 3,45 | 5,12  | 5,48  |
| 11/6-3  | 53,27 | 40,7  | 736,4 | 14,0 | 1,337 | 2,10 | 3,21  | 9,19  |
| 47/2-1  | 49,03 | 41,8  | 288,1 | 13,8 | 1,955 | 3,42 | 4,69  | 2,40  |
| 47/2-2  | 48,31 | 42,1  | 298,4 | 13,9 | 1,845 | 3,24 | 4,35  | 2,66  |
| 47/2-3  | 48,31 | 49,6  | 291,5 | 14,0 | 1,640 | 2,89 | 3,30  | 2,91  |
| 20/10-1 | 52,14 | 40,2  | 832,5 | 13,9 | 1,755 | 2,89 | 4,07  | 8,31  |
| 20/10-2 | 50,37 | 44,1  | 811,8 | 13,9 | 1,634 | 2,77 | 3,71  | 8,10  |
| 20/10-3 | 55,77 | 48,3  | 876,2 | 13,8 | 1,289 | 2,00 | 2,84  | 10,41 |
| 17/7-1  | 85,48 | 68,9  | 354,5 | 13,8 | 1,261 | 1,24 | 2,37  | 3,54  |
| 17/7-2  | 86,09 | 69,5  | 365,6 | 13,8 | 2,456 | 2,40 | 3,20  | 2,68  |
| 17/7-3  | 87,03 | 65,3  | 381,0 | 13,7 | 2,458 | 2,38 | 3,41  | 2,80  |
| 55/10-1 | 55,87 | 52,2  | 562,4 | 13,6 | 2,480 | 3,80 | 4,76  | 3,69  |
| 55/10-2 | 53,52 | 53,1  | 571,5 | 13,8 | 2,615 | 4,18 | 4,93  | 3,57  |
| 55/10-3 | 58,57 | 52,7  | 572,5 | 13,9 | 2,393 | 3,44 | 4,47  | 3,97  |
| 15/1-1  | 68,42 | 92,3  | 538,8 | 13,7 | 2,146 | 2,61 | 2,78  | 4,20  |
| 15/1-2  | 62,52 | 72,4  | 556,4 | 13,6 | 2,534 | 3,40 | 3,43  | 3,65  |
| 15/1-3  | 60,51 | 75,1  | 486,1 | 13,6 | 2,456 | 3,42 | 3,22  | 3,43  |
| 65/3-1  | 44,57 | 79,6  | 844,3 | 13,6 | 2,513 | 4,77 | 3,12  | 5,54  |
| 65/3-2  | 47,35 | 85,3  | 856,5 | 13,5 | 2,569 | 4,60 | 2,99  | 5,48  |
| 65/3-3  | 48,37 | 88,1  | 834,5 | 13,6 | 2,335 | 4,04 | 2,60  | 5,95  |
| 58/8-1  | 66,81 | 86,5  | 439,5 | 13,5 | 2,482 | 3,18 | 2,87  | 2,89  |
| 58/8-2  | 63,81 | 81,2  | 442,7 | 13,6 | 2,207 | 2,89 | 2,66  | 3,35  |
| 58/8-3  | 67,85 | 83,6  | 435,1 | 13,5 | 2,377 | 2,97 | 2,82  | 3,02  |
| 63/2-1  | 87,19 | 23,8  | 454,5 | 13,4 | 2,276 | 2,18 | 9,34  | 3,34  |
| 63/2-2  | 89,03 | 24,8  | 445,1 | 13,6 | 2,382 | 2,26 | 9,49  | 3,09  |
| 63/2-3  | 88,81 | 24,8  | 475,4 | 13,4 | 2,399 | 2,27 | 9,49  | 3,29  |
| 64/-2-1 | 78,93 | 77,8  | 566,1 | 13,3 | 2,016 | 2,20 | 2,61  | 4,55  |
| 64/2-2  | 77,28 | 60,2  | 545,1 | 13,4 | 2,393 | 2,60 | 3,91  | 3,78  |
| 64/2-3  | 72,51 | 74,1  | 564,5 | 13,5 | 2,231 | 2,62 | 3,00  | 4,14  |
| 57/4-1  | 47,26 | 68,3  | 203,4 | 13,2 | 2,641 | 4,73 | 3,83  | 1,27  |
| 57/4-2  | 47,99 | 68,9  | 239,0 | 13,4 | 2,655 | 4,66 | 3,80  | 1,49  |
| 57/4-3  | 45,61 | 69,5  | 210,5 | 13,2 | 2,626 | 4,90 | 3,76  | 1,31  |
| 61/2-1  | 61,51 | 25,3  | 764,8 | 13,3 | 2,615 | 3,45 | 10,34 | 4,77  |
| 61/2-2  | 65,64 | 22,2  | 777,8 | 13,2 | 2,525 | 3,24 | 11,19 | 5,11  |
| 61/2-3  | 69,61 | 23,1  | 776,2 | 13,2 | 2,553 | 3,13 | 11,04 | 4,97  |
| 59/2-1  | 75,88 | 32,26 | 322,6 | 13,1 | 2,595 | 2,87 | 7,91  | 2,06  |
| 59/2-2  | 72,16 | 33,41 | 334,1 | 13,3 | 2,535 | 2,94 | 7,44  | 2,19  |
| 59/2-3  | 75,26 | 32,56 | 325,6 | 13,4 | 2,530 | 2,82 | 7,63  | 2,14  |
| 62/2-1  | 53,88 | 62,26 | 622,5 | 13,1 | 2,621 | 4,15 | 4,20  | 3,88  |
| 62/2-2  | 57,92 | 63,41 | 634,1 | 13,2 | 2,606 | 3,76 | 4,02  | 4,06  |
| 62/2-3  | 57,03 | 62,54 | 625,4 | 13,1 | 2,638 | 3,92 | 4,18  | 3,90  |

ain protein  
rain

| [Ca][Phy]/[Zn]<br>(mol/kg) | TGW, g |
|----------------------------|--------|
| 0,95                       | 40,35  |
| 0,93                       | 40,45  |
| 1,05                       | 45,45  |
| 1,39                       | 41,45  |
| 1,16                       | 42,75  |
| 1,18                       | 38,00  |
| 2,11                       | 41,35  |
| 3,01                       | 39,30  |
| 2,76                       | 42,25  |
| 1,63                       | 51,45  |
| 1,64                       | 44,80  |
| 1,62                       | 50,35  |
| 1,62                       | 47,95  |
| 1,57                       | 48,45  |
| 1,33                       | 44,50  |
| 0,66                       | 43,25  |
| 0,67                       | 42,75  |
| 0,62                       | 46,50  |
| 0,68                       | 52,95  |
| 0,72                       | 54,00  |
| 0,76                       | 57,40  |
| 1,24                       | 42,90  |
| 1,24                       | 43,05  |
| 1,23                       | 43,30  |
| 0,23                       | 39,10  |
| 0,21                       | 40,70  |
| 0,24                       | 42,25  |
| 1,21                       | 39,40  |
| 1,47                       | 37,60  |
| 1,41                       | 41,85  |
| 1,85                       | 42,05  |
| 1,91                       | 41,65  |
| 2,71                       | 41,90  |
| 0,48                       | 45,95  |
| 0,51                       | 45,30  |
| 0,56                       | 45,55  |
| 0,64                       | 37,45  |
| 0,67                       | 38,65  |
| 0,66                       | 43,30  |
| 0,94                       | 42,65  |
| 0,95                       | 46,60  |
| 1,02                       | 42,30  |
| 0,54                       | 41,85  |
| 0,52                       | 42,10  |
| 0,49                       | 43,10  |
| 0,36                       | 44,75  |
| 0,35                       | 43,80  |
| 0,29                       | 43,00  |
| 0,38                       | 43,05  |

|      |       |
|------|-------|
| 0,39 | 38,50 |
| 0,42 | 44,20 |
| 1,68 | 33,25 |
| 1,86 | 36,75 |
| 1,58 | 36,85 |
| 1,34 | 42,10 |
| 1,37 | 37,25 |
| 0,90 | 42,40 |
| 0,52 | 42,60 |
| 0,50 | 43,35 |
| 0,37 | 43,05 |
| 1,29 | 41,30 |
| 1,15 | 41,65 |
| 0,95 | 41,80 |
| 0,32 | 41,30 |
| 0,45 | 44,70 |
| 0,50 | 42,00 |
| 1,02 | 41,15 |
| 1,07 | 41,80 |
| 0,98 | 39,45 |
| 0,57 | 46,95 |
| 0,73 | 41,65 |
| 0,63 | 42,30 |
| 1,01 | 43,25 |
| 0,98 | 41,90 |
| 0,83 | 42,85 |
| 0,48 | 42,65 |
| 0,45 | 42,55 |
| 0,47 | 42,70 |
| 1,62 | 35,30 |
| 1,61 | 36,50 |
| 1,72 | 34,10 |
| 0,56 | 35,10 |
| 0,81 | 34,15 |
| 0,65 | 32,25 |
| 0,30 | 40,65 |
| 0,35 | 45,45 |
| 0,30 | 41,40 |
| 3,02 | 45,20 |
| 3,32 | 44,10 |
| 3,27 | 52,15 |
| 0,97 | 43,30 |
| 0,95 | 42,05 |
| 0,95 | 44,95 |
| 1,00 | 44,75 |
| 0,97 | 41,40 |
| 1,00 | 40,30 |
